# Supplementary material for: Investigation of the Factor Structure and Differential Item Functioning of the Child and Adolescent Mindfulness Measure (CAMM): Analysis of Data from a School-Based Cluster Randomised Controlled Trial
Source: Springer Nature journal article supplement (doi:10.1007/s12671-023-02166-9), 2023-06-26
Supplement: MOESM1 [file 25540278]

**Investigation of the factor structure and differential item functioning of the Child and Adolescent Mindfulness Measure (CAMM): analysis of data from a school-based cluster randomised controlled trial.** *Mindfulness*. Sanders, A.1, Gains, H.1, Baer, R.2, Ball, S.3, Jones, B.3, Banks, H.1, Melendez-Torres, GJ.1, Ukoumunne, O. C.3 ([O.C.Ukoumunne@exeter.ac.uk](mailto:O.C.Ukoumunne@exeter.ac.uk)).

1University of Exeter, Faculty of Health and Life Sciences

2University of Oxford, Department of Psychiatry

3University of Exeter, NIHR Applied Research Collaboration South West Peninsula

**Table A1: Polychoric correlations between CAMM items and item summaries at post-intervention (*n* = 7472)**

| **Polychoric correlations** |  | *ITEM 1* | *ITEM 2* | *ITEM 3* | *ITEM 4* | *ITEM 5* | *ITEM 6* | *ITEM 7* | *ITEM 8* | *ITEM 9* | *ITEM 10* |
| --- | --- | --- | --- | --- | --- | --- | --- | --- | --- | --- | --- |
| *ITEM 2* |  | 0.51 |  |  |  |  |  |  |  |  |  |
| *ITEM 3* |  | 0.50 | 0.43 |  |  |  |  |  |  |  |  |
| *ITEM 4* |  | 0.67 | 0.40 | 0.53 |  |  |  |  |  |  |  |
| *ITEM 5* |  | 0.18 | 0.14 | 0.36 | 0.38 |  |  |  |  |  |  |
| *ITEM 6* |  | 0.44 | 0.48 | 0.38 | 0.39 | 0.19 |  |  |  |  |  |
| *ITEM 7* |  | 0.78 | 0.46 | 0.51 | 0.70 | 0.25 | 0.49 |  |  |  |  |
| *ITEM 8* |  | 0.62 | 0.47 | 0.45 | 0.54 | 0.21 | 0.46 | 0.66 |  |  |  |
| *ITEM 9* |  | 0.70 | 0.45 | 0.50 | 0.70 | 0.30 | 0.46 | 0.78 | 0.64 |  |  |
| *ITEM 10* |  | 0.26 | 0.16 | 0.37 | 0.42 | 0.64 | 0.22 | 0.34 | 0.25 | 0.43 |  |
| **Item score summary** |  | *ITEM 1* | *ITEM 2* | *ITEM 3* | *ITEM 4* | *ITEM 5* | *ITEM 6* | *ITEM 7* | *ITEM 8* | *ITEM 9* | *ITEM 10* |
| *0 (less mindful), %* |  | 6.1 | 3.7 | 4.9 | 6.8 | 10.6 | 8.7 | 7.0 | 11.9 | 6.4 | 6.4 |
| *1, %* |  | 11.1 | 10.3 | 11.1 | 11.9 | 17.4 | 14.0 | 11.4 | 21.1 | 11.1 | 9.9 |
| *2, %* |  | 18.2 | 19.6 | 23.3 | 20.7 | 26.3 | 22.3 | 18.7 | 27.3 | 20.5 | 20.4 |
| *3, %* |  | 28.4 | 26.2 | 27.8 | 23.1 | 24.8 | 25.5 | 22.8 | 21.8 | 24.7 | 26.7 |
| *4, (more mindful) %* |  | 36.2 | 40.3 | 33.0 | 37.5 | 21.0 | 29.5 | 40.1 | 17.9 | 37.3 | 36.7 |
| Mean (*SD*) |  | 2.77 (1.22) | 2.89 (1.15) | 2.73 (1.17) | 2.72 (1.26) | 2.28 (1.27) | 2.53 (1.28) | 2.77 (1.27) | 2.13 (1.27) | 2.75 (1.24) | 2.78 (1.22) |
