# Supplementary material for: Investigation of the Factor Structure and Differential Item Functioning of the Child and Adolescent Mindfulness Measure (CAMM): Analysis of Data from a School-Based Cluster Randomised Controlled Trial
Source: Springer Nature journal article supplement (doi:10.1007/s12671-023-02166-9), 2023-06-26
Supplement: MOESM2 [file 25540278]

**Investigation of the factor structure and differential item functioning of the Child and Adolescent Mindfulness Measure (CAMM): Analysis of data from a school-based cluster randomised controlled trial.** *Mindfulness*. Sanders, A.1, Gains, H.1, Baer, R.2, Ball, S.3, Jones, B.3, Banks, H.1, Melendez-Torres, GJ.1, Ukoumunne, O. C.3 ([O.C.Ukoumunne@exeter.ac.uk](mailto:O.C.Ukoumunne@exeter.ac.uk)).

1University of Exeter, Faculty of Health and Life Sciences

2University of Oxford, Department of Psychiatry

3University of Exeter, NIHR Applied Research Collaboration South West Peninsula

**Table A2: Polychoric correlations between CAMM items and item summaries at 1-year follow-up (*n* = 7171)**

| **Polychoric correlations** |  | *ITEM 1* | *ITEM 2* | *ITEM 3* | *ITEM 4* | *ITEM 5* | *ITEM 6* | *ITEM 7* | *ITEM 8* | *ITEM 9* | *ITEM 10* |
| --- | --- | --- | --- | --- | --- | --- | --- | --- | --- | --- | --- |
| *ITEM 2* |  | 0.54 |  |  |  |  |  |  |  |  |  |
| *ITEM 3* |  | 0.55 | 0.47 |  |  |  |  |  |  |  |  |
| *ITEM 4* |  | 0.72 | 0.45 | 0.60 |  |  |  |  |  |  |  |
| *ITEM 5* |  | 0.29 | 0.19 | 0.42 | 0.44 |  |  |  |  |  |  |
| *ITEM 6* |  | 0.48 | 0.52 | 0.41 | 0.43 | 0.24 |  |  |  |  |  |
| *ITEM 7* |  | 0.80 | 0.51 | 0.56 | 0.76 | 0.35 | 0.51 |  |  |  |  |
| *ITEM 8* |  | 0.64 | 0.50 | 0.51 | 0.60 | 0.29 | 0.49 | 0.68 |  |  |  |
| *ITEM 9* |  | 0.74 | 0.49 | 0.55 | 0.75 | 0.38 | 0.47 | 0.81 | 0.67 |  |  |
| *ITEM 10* |  | 0.33 | 0.19 | 0.42 | 0.46 | 0.67 | 0.24 | 0.39 | 0.30 | 0.48 |  |
| **Item score summary** |  | *ITEM 1* | *ITEM 2* | *ITEM 3* | *ITEM 4* | *ITEM 5* | *ITEM 6* | *ITEM 7* | *ITEM 8* | *ITEM 9* | *ITEM 10* |
| *0 (less mindful), %* |  | 6.0 | 4.1 | 4.9 | 6.5 | 9.6 | 8.2 | 6.5 | 11.6 | 6.0 | 6.4 |
| *1, %* |  | 11.8 | 10.4 | 11.2 | 11.7 | 16.3 | 12.1 | 11.1 | 19.1 | 11.5 | 9.4 |
| *2, %* |  | 19.2 | 20.7 | 23.5 | 20.4 | 26.5 | 23.7 | 19.5 | 27.9 | 20.1 | 21.0 |
| *3, %* |  | 26.9 | 25.6 | 26.9 | 23.4 | 24.7 | 25.8 | 22.2 | 21.4 | 24.2 | 25.8 |
| *4, (more mindful) %* |  | 36.1 | 39.2 | 33.4 | 38.1 | 22.8 | 30.2 | 40.8 | 20.0 | 38.3 | 37.4 |
| Mean (*SD*) |  | 2.75 (1.23) | 2.86 (1.17) | 2.73 (1.18) | 2.75 (1.25) | 2.35 (1.26) | 2.58 (1.26) | 2.80 (1.26) | 2.19 (1.28) | 2.77 (1.24) | 2.78 (1.22) |
|  |  |  |  |  |  |  |  |  |  |  |  |
